# Supplementary material for: Early-Life Exposure to Outdoor Air Pollution and Respiratory Health, Ear Infections, and Eczema in Infants from the INMA Study
Source: PubMed Central journal article supplement (PMC3621204; doi:10.1289/ehp.1205281), 2012-12-05
Supplement: ehp.1205281.s001.pdf [file ehp.1205281.s001.pdf]

## SUPPLEMENTAL MATERIAL

### **Early Life Exposure to Outdoor Air Pollution and Respiratory Health, Ear Infections, and Eczema in Infants from the INMA Study**

Inmaculada Aguilera, Marie Pedersen, Raquel Garcia-Esteban, Ferran Ballester, Mikel Basterrechea, Ana Esplugues, Ana Fernández-Somoano, Aitana Lertxundi, Adonina Tardón, and Jordi Sunyer

Figure S1. Flowchart illustrating the main phases in the study..... p.2

Table S1. Air pollution sampling campaigns, LUR models and fixed stations used for temporal adjustment in each study area.....p.3

Table S2. Adjusted associations between prenatal exposure to outdoor NO<sub>2</sub> or benzene (per IQR increase) and LRTI, wheezing, eczema, and ear infections during the first 12-18 months of age..... p.6

Table S3. Adjusted associations between prenatal and postnatal exposure to outdoor NO<sub>2</sub> or benzene and ear infections by study area.....p.7

Table S4. Adjusted associations between prenatal exposure to outdoor NO<sub>2</sub> or benzene and LRTI, wheezing, eczema, and ear infections during the first 12-18 months of age, stratified by potential modifying factors.....p.9

Figure S1. Flowchart illustrating the main phases in the study

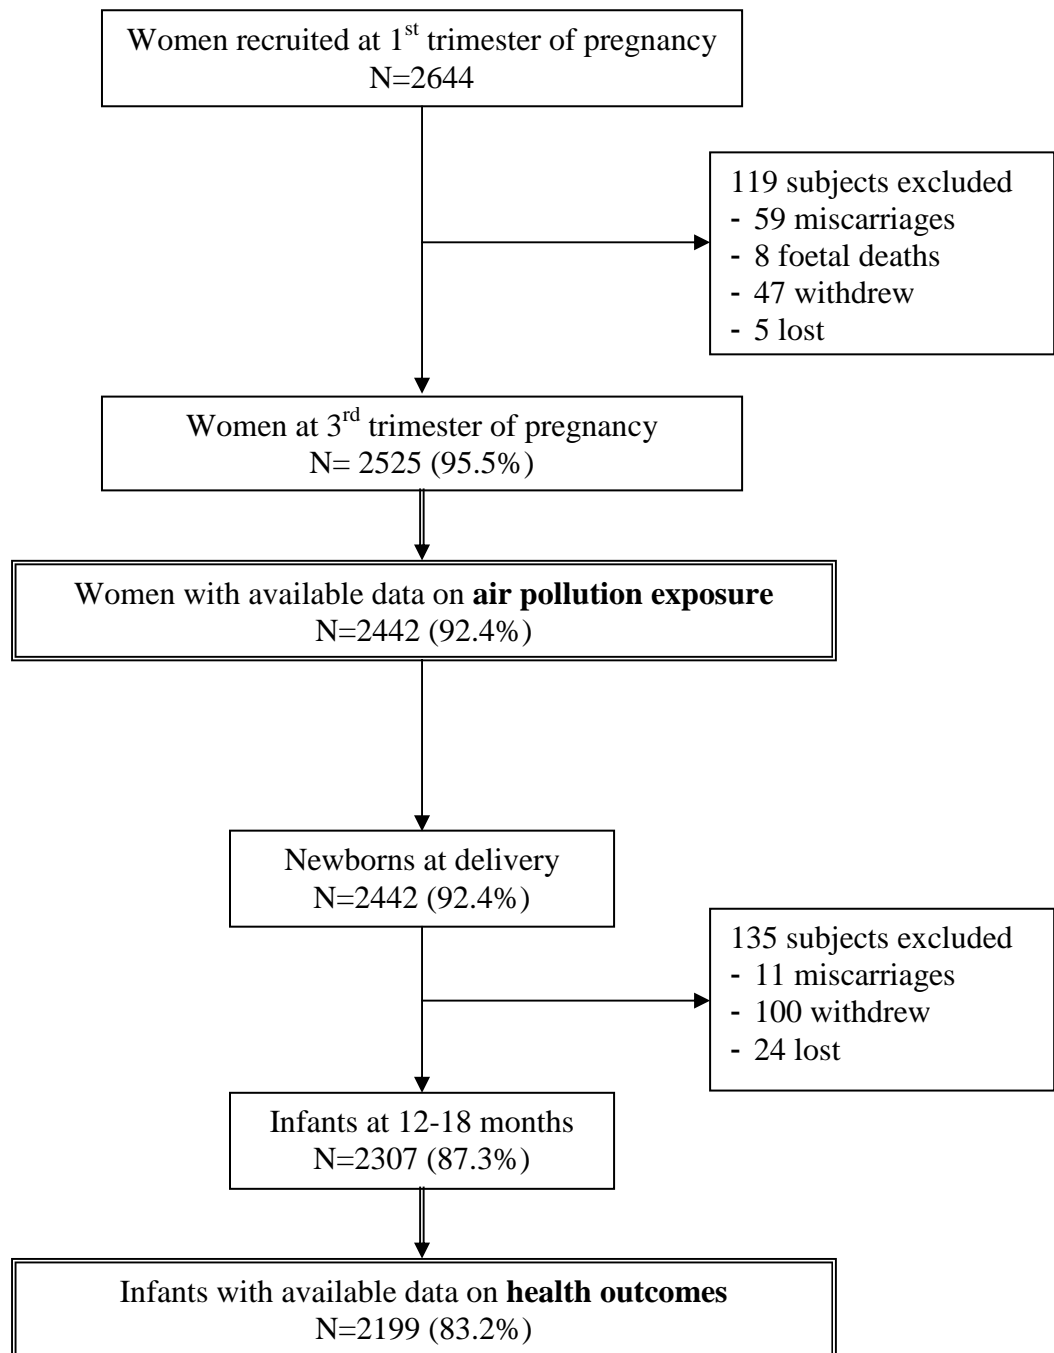

Table S1. Air pollution sampling campaigns, LUR models and fixed stations used for temporal adjustment in each study area

| Study area            | No. sampling sites | Sampling campaigns                                | Variables LUR model                                                                                                                                                              | R <sup>2</sup> LUR model | No. fixed stations (prenatal period) | No. fixed stations (postnatal period) | Pollutant used for temporal adjustment <sup>a</sup> |
|-----------------------|--------------------|---------------------------------------------------|----------------------------------------------------------------------------------------------------------------------------------------------------------------------------------|--------------------------|--------------------------------------|---------------------------------------|-----------------------------------------------------|
| <b>NO<sub>2</sub></b> |                    |                                                   |                                                                                                                                                                                  |                          |                                      |                                       |                                                     |
| Asturias              | 67                 | June 05<br>November 05                            | Altitude<br>Log-transformed distance to nearest road<br>Agricultural or forest land cover within 300 m                                                                           | 0.52                     | 4                                    | 4                                     | NO <sub>2</sub>                                     |
| Gipuzkoa              | 85                 | February 07<br>June 07                            | Altitude (3 cat)<br>Valley factor<br>Distance to nearest major road (defined as ADT <sup>b</sup> >20,000)<br>Urban land cover within 100 m<br>Industrial land cover within 300 m | 0.51                     | 2                                    | 2                                     | NO <sub>2</sub>                                     |
| Sabadell              | 57                 | April 05<br>June 05<br>October 05<br>March 06     | Altitude<br>Urban and industrial land cover within 500 m<br>Road type (3 cat)                                                                                                    | 0.75                     | 1                                    | 1                                     | NO <sub>2</sub>                                     |
| Valencia              | 93                 | April 04<br>June 04<br>November 04<br>February 05 | Log-transformed distance to nearest major road (defined as ADT <sup>b</sup> >10000)<br>Kriging estimate <sup>c</sup><br>Industrial or urban land cover within 500 m              | 0.73                     | 7                                    | 3                                     | NO <sub>2</sub>                                     |

Table S1 (continued)

| Study area     | No. sampling sites | Sampling campaigns                                | Variables LUR model                                                                                                                                                                                                      | R <sup>2</sup> LUR model | No. fixed stations (prenatal period) | No. fixed stations (postnatal period) | Pollutant used for temporal adjustment <sup>a</sup> |
|----------------|--------------------|---------------------------------------------------|--------------------------------------------------------------------------------------------------------------------------------------------------------------------------------------------------------------------------|--------------------------|--------------------------------------|---------------------------------------|-----------------------------------------------------|
| <b>BENZENE</b> |                    |                                                   |                                                                                                                                                                                                                          |                          |                                      |                                       |                                                     |
| Asturias       | 67                 | June 05<br>November 05                            | Altitude<br>Distance to nearest road with ADT <sup>b</sup> =1,001-5,000<br>Continuous urban land cover within 300 m<br>Discontinuous urban land cover within 1,000 m<br>Agricultural or forest land cover within 1,000 m | 0.73                     | 4                                    | 4                                     | SO <sub>2</sub>                                     |
| Gipuzkoa       | 85                 | February 07<br>June 07                            | Valley factor<br>Log-transformed distance to nearest major road (defined as ADT <sup>b</sup> >20,000)<br>Urban land cover within 100 m<br>Distance to industry                                                           | 0.44                     | 2                                    | 2                                     | NO <sub>2</sub>                                     |
| Sabadell       | 57                 | April 05<br>June 05<br>October 05<br>March 06     | Road type (3 cat)<br>Population density within 50 m<br>Urban land cover within 300 m<br>Building density within 500 m                                                                                                    | 0.73                     | 1                                    | 1                                     | NO <sub>2</sub>                                     |
| Valencia       | 93                 | April 04<br>June 04<br>November 04<br>February 05 | Urban land cover within 500 m<br>Log-transformed distance to nearest major road (defined as ADT <sup>b</sup> >50,000)<br>Longitude                                                                                       | 0.44                     | 7                                    | 3                                     | NO                                                  |

<sup>a</sup> Due to the lack of benzene measurements in many stations and high missing data in those stations measuring benzene, we used the pollutant that exhibited the highest correlation with benzene for temporal adjustment

<sup>b</sup> ADT: Average daily traffic (vehicles/day)

<sup>c</sup> Mean of estimated NO<sub>2</sub> from kriging among campaigns

*References:*

- Aguilera et al. Estimation of outdoor NO<sub>x</sub>, NO<sub>2</sub>, and BTEX exposure in a cohort of pregnant women using land use regression modeling. *Environ Sci Technol* 42:815-821.

- Fernández-Somoano et al. Outdoor NO<sub>2</sub> and benzene exposure in the INMA (Environment and Childhood) Asturias cohort (Spain). *Atmos Env* 2011; 45:5240-5246.

- Iñiguez et al. Estimation of personal NO<sub>2</sub> exposure in a cohort of pregnant women. *Sci Total Environ* 2009; 407:6093-6099.

Table S2. Adjusted associations<sup>a</sup> between prenatal exposure to outdoor NO<sub>2</sub> or benzene (per IQR increase) and LRTI, wheezing, eczema, and ear infections during the first 12-18 months of age

| Health outcome               | Exposure period    | NO <sub>2</sub> (per IQR increase) |      |              | Benzene (per IQR increase) |      |              |
|------------------------------|--------------------|------------------------------------|------|--------------|----------------------------|------|--------------|
|                              |                    | IQR (µg/m <sup>3</sup> )           | RR   | (95% C.I.)   | IQR (µg/m <sup>3</sup> )   | RR   | (95% C.I.)   |
| <b>Doctor-diagnosed LRTI</b> | Entire prenatal    | 16.5                               | 1.08 | (0.97, 1.21) | 1.3                        | 1.06 | (0.94, 1.19) |
|                              | First trimester    | 18.6                               | 1.11 | (1.00, 1.24) | 1.3                        | 1.08 | (0.99, 1.17) |
|                              | Second trimester   | 17.0                               | 1.14 | (1.03, 1.26) | 1.0                        | 1.10 | (1.01, 1.20) |
|                              | Third trimester    | 17.5                               | 0.99 | (0.87, 1.12) | 1.1                        | 0.99 | (0.86, 1.13) |
|                              | First year of life | 15.7                               | 1.04 | (0.92, 1.17) | 1.2                        | 1.02 | (0.92, 1.13) |
| <b>Wheezing</b>              | Entire prenatal    | 16.5                               | 1.05 | (0.94, 1.18) | 1.3                        | 1.01 | (0.92, 1.11) |
|                              | First trimester    | 18.6                               | 1.04 | (0.93, 1.17) | 1.3                        | 1.00 | (0.93, 1.07) |
|                              | Second trimester   | 17.0                               | 1.09 | (0.99, 1.20) | 1.0                        | 1.02 | (0.96, 1.09) |
|                              | Third trimester    | 17.5                               | 1.01 | (0.90, 1.14) | 1.1                        | 1.00 | (0.93, 1.07) |
|                              | First year of life | 15.7                               | 1.07 | (0.96, 1.19) | 1.2                        | 0.97 | (0.88, 1.07) |
| <b>Eczema</b>                | Entire prenatal    | 16.5                               | 1.00 | (0.85, 1.18) | 1.3                        | 1.02 | (0.87, 1.21) |
|                              | First trimester    | 18.6                               | 0.94 | (0.80, 1.10) | 1.3                        | 0.92 | (0.76, 1.11) |
|                              | Second trimester   | 17.0                               | 1.02 | (0.87, 1.19) | 1.0                        | 1.02 | (0.86, 1.22) |
|                              | Third trimester    | 17.5                               | 1.02 | (0.87, 1.19) | 1.1                        | 1.08 | (0.97, 1.20) |
|                              | First year of life | 15.7                               | 1.03 | (0.88, 1.20) | 1.2                        | 1.10 | (0.97, 1.26) |
| <b>Ear infections</b>        | Entire prenatal    | 16.5                               | 1.31 | (0.97, 1.76) | 1.3                        | 1.17 | (0.93, 1.46) |
|                              | First trimester    | 18.6                               | 1.22 | (0.99, 1.50) | 1.3                        | 1.11 | (1.03, 1.20) |
|                              | Second trimester   | 17.0                               | 1.29 | (0.97, 1.71) | 1.0                        | 1.13 | (1.00, 1.27) |
|                              | Third trimester    | 17.5                               | 1.23 | (0.96, 1.57) | 1.1                        | 1.02 | (0.91, 1.14) |
|                              | First year of life | 15.7                               | 1.24 | (1.01, 1.52) | 1.2                        | 1.10 | (0.99, 1.22) |

<sup>a</sup> Associations are adjusted for the covariates indicated in Table 3 of the main manuscript

Table S3. Adjusted associations between prenatal and postnatal exposure to outdoor NO<sub>2</sub> or benzene and ear infections by study area

| Study area                                             | NO <sub>2</sub><br>(per 10 µg/m <sup>3</sup> increase) |              | Benzene<br>(per 1 µg/m <sup>3</sup> increase) |              |
|--------------------------------------------------------|--------------------------------------------------------|--------------|-----------------------------------------------|--------------|
|                                                        | RR                                                     | (95% C.I.)   | RR                                            | (95% C.I.)   |
| Exposure during the entire prenatal period             |                                                        |              |                                               |              |
| Asturias <sup>a</sup>                                  | 1.40                                                   | (1.14, 1.71) | 1.10                                          | (1.01, 1.21) |
| Gipuzkoa <sup>b</sup>                                  | 1.22                                                   | (1.01, 1.48) | 0.87                                          | (0.54, 1.40) |
| Sabadell <sup>c</sup>                                  | 0.92                                                   | (0.80, 1.06) | 0.90                                          | (0.57, 1.43) |
| Valencia <sup>d</sup>                                  | 1.25                                                   | (1.10, 1.42) | 1.38                                          | (1.12, 1.71) |
| <b>Meta-analysis</b>                                   | 1.18                                                   | (0.98, 1.41) | 1.13                                          | (0.95, 1.34) |
| p-Value <sup>e</sup>                                   | 0.002                                                  |              | 0.121                                         |              |
| Exposure during 1 <sup>st</sup> trimester of pregnancy |                                                        |              |                                               |              |
| Asturias <sup>a</sup>                                  | 1.27                                                   | (1.06, 1.51) | 1.08                                          | (1.00, 1.16) |
| Gipuzkoa <sup>b</sup>                                  | 1.16                                                   | (0.97, 1.39) | 0.87                                          | (0.55, 1.36) |
| Sabadell <sup>c</sup>                                  | 0.96                                                   | (0.86, 1.09) | 1.00                                          | (0.67, 1.50) |
| Valencia <sup>d</sup>                                  | 1.13                                                   | (1.03, 1.25) | 1.11                                          | (1.00, 1.23) |
| <b>Meta-analysis</b>                                   | 1.11                                                   | (0.99, 1.24) | 1.08                                          | (1.02, 1.15) |
| p-Value <sup>e</sup>                                   | 0.048                                                  |              | 0.726                                         |              |
| Exposure during 2 <sup>nd</sup> trimester of pregnancy |                                                        |              |                                               |              |
| Asturias <sup>a</sup>                                  | 1.34                                                   | (1.12, 1.59) | 1.11                                          | (1.01, 1.21) |
| Gipuzkoa <sup>b</sup>                                  | 1.18                                                   | (0.98, 1.42) | 0.85                                          | (0.53, 1.36) |
| Sabadell <sup>c</sup>                                  | 0.94                                                   | (0.84, 1.05) | 0.92                                          | (0.62, 1.36) |
| Valencia <sup>d</sup>                                  | 1.25                                                   | (1.13, 1.39) | 1.24                                          | (1.12, 1.37) |
| <b>Meta-analysis</b>                                   | 1.16                                                   | (0.98, 1.37) | 1.13                                          | (1.00, 1.27) |
| p-Value <sup>e</sup>                                   | <0.001                                                 |              | 0.120                                         |              |
| Exposure during 3 <sup>rd</sup> trimester of pregnancy |                                                        |              |                                               |              |
| Asturias <sup>a</sup>                                  | 1.34                                                   | (1.12, 1.61) | 1.10                                          | (1.00, 1.21) |
| Gipuzkoa <sup>b</sup>                                  | 1.20                                                   | (0.99, 1.45) | 0.85                                          | (0.53, 1.38) |
| Sabadell <sup>c</sup>                                  | 0.94                                                   | (0.83, 1.06) | 0.91                                          | (0.60, 1.37) |
| Valencia <sup>d</sup>                                  | 1.11                                                   | (1.01, 1.22) | 0.96                                          | (0.85, 1.08) |
| <b>Meta-analysis</b>                                   | 1.12                                                   | (0.98, 1.29) | 1.02                                          | (0.92, 1.13) |
| p-Value <sup>e</sup>                                   | 0.008                                                  |              | 0.228                                         |              |
| Exposure during the first year of life                 |                                                        |              |                                               |              |
| Asturias <sup>a</sup>                                  | 1.34                                                   | (1.11, 1.62) | 1.08                                          | (0.98, 1.20) |
| Gipuzkoa <sup>b</sup>                                  | 1.23                                                   | (1.03, 1.46) | 1.04                                          | (0.74, 1.47) |
| Sabadell <sup>c</sup>                                  | 0.97                                                   | (0.84, 1.12) | 1.01                                          | (0.64, 1.59) |
| Valencia <sup>d</sup>                                  | 1.14                                                   | (1.01, 1.29) | 1.10                                          | (0.89, 1.37) |
| <b>Meta-analysis</b>                                   | 1.15                                                   | (1.01, 1.31) | 1.08                                          | (0.99, 1.18) |
| p-Value <sup>e</sup>                                   | 0.006                                                  |              | 0.120                                         |              |

Adjusted for:

<sup>a</sup> Child's sex, age at follow-up, day care attendance, siblings at birth, and maternal asthma.

<sup>b</sup> Child's sex, age at follow-up, day care attendance, parental allergy, exposure to secondhand smoke during pregnancy, and birth season.

<sup>c</sup> Child's sex, age at follow-up, day care attendance, siblings at birth, and maternal post-natal smoking.

<sup>d</sup> Child's sex, age at follow-up, day care attendance, parental asthma, maternal pre-pregnancy BMI, and paternal post-natal smoking.

<sup>e</sup> *p*-Value for the Chi-square test for heterogeneity



Table S4. Adjusted associations<sup>a</sup> between prenatal exposure to outdoor NO<sub>2</sub> or benzene and LRTI, wheezing, eczema, and ear infections during the first 12-18 months of age, stratified by potential modifying factors.

| Health outcome                                | NO <sub>2</sub> (per 10 µg/m <sup>3</sup> increase) |              |                              | Benzene (per 1 µg/m <sup>3</sup> increase) |              |                              |
|-----------------------------------------------|-----------------------------------------------------|--------------|------------------------------|--------------------------------------------|--------------|------------------------------|
|                                               | RR                                                  | (95% C.I.)   | <i>p</i> -Value <sup>b</sup> | RR                                         | (95% C.I.)   | <i>p</i> -Value <sup>b</sup> |
| <b>Doctor-diagnosed LRTI</b>                  |                                                     |              |                              |                                            |              |                              |
| Fruits and vegetables intake during pregnancy |                                                     |              |                              |                                            |              |                              |
| ≤ 517.26 gr/day                               | 0.94                                                | (0.85, 1.04) |                              | 1.07                                       | (0.94, 1.23) |                              |
| > 517.26 gr/day                               | 1.13                                                | (1.04, 1.23) | 0.094                        | 1.10                                       | (0.93, 1.29) | 0.498                        |
| Circulating vitamin D during pregnancy        |                                                     |              |                              |                                            |              |                              |
| ≤ 20.89 ng/mL                                 | 1.11                                                | (0.99, 1.26) |                              | 1.11                                       | (0.84, 1.47) |                              |
| 20.90 - 30.20 ng/mL                           | 1.10                                                | (0.94, 1.28) |                              | 1.24                                       | (1.10, 1.40) |                              |
| > 30.20 ng/mL                                 | 0.99                                                | (0.88, 1.12) | 0.492                        | 1.00                                       | (0.84, 1.21) | 0.041                        |
| Duration of breastfeeding                     |                                                     |              |                              |                                            |              |                              |
| None                                          | 1.05                                                | (0.88, 1.25) |                              | 1.08                                       | (0.84, 1.39) |                              |
| ≤ 6 months                                    | 1.12                                                | (0.94, 1.33) |                              | 1.03                                       | (0.84, 1.25) |                              |
| > 6 months                                    | 0.89                                                | (0.74, 1.08) | 0.600                        | 0.86                                       | (0.59, 1.25) | 0.537                        |
| <b>Wheezing</b>                               |                                                     |              |                              |                                            |              |                              |
| Fruits and vegetables intake during pregnancy |                                                     |              |                              |                                            |              |                              |
| ≤ 517.26 gr/day                               | 0.99                                                | (0.88, 1.11) |                              | 1.04                                       | (0.91, 1.18) |                              |
| > 517.26 gr/day                               | 1.04                                                | (0.95, 1.14) | 0.675                        | 1.02                                       | (0.88, 1.19) | 0.925                        |
| Circulating vitamin D during pregnancy        |                                                     |              |                              |                                            |              |                              |
| ≤ 20.89 ng/mL                                 | 1.06                                                | (0.94, 1.20) |                              | 1.09                                       | (0.85, 1.39) |                              |
| 20.90 - 30.20 ng/mL                           | 1.03                                                | (0.90, 1.18) |                              | 1.07                                       | (0.96, 1.19) |                              |
| > 30.20 ng/mL                                 | 0.98                                                | (0.84, 1.15) | 0.922                        | 0.96                                       | (0.76, 1.20) | 0.416                        |
| Duration of breastfeeding                     |                                                     |              |                              |                                            |              |                              |
| None                                          | 1.05                                                | (0.91, 1.22) |                              | 1.01                                       | (0.90, 1.13) |                              |
| ≤ 6 months                                    | 1.00                                                | (0.89, 1.12) |                              | 0.95                                       | (0.77, 1.17) |                              |
| > 6 months                                    | 1.13                                                | (0.95, 1.34) | 0.531                        | 1.27                                       | (0.97, 1.67) | 0.182                        |

Table S4 (continued)

| <b>Health outcome</b>                           | <b>NO<sub>2</sub> (per 10 µg/m<sup>3</sup> increase)</b> |                   |                                   | <b>Benzene (per 1 µg/m<sup>3</sup> increase)</b> |                   |                                   |
|-------------------------------------------------|----------------------------------------------------------|-------------------|-----------------------------------|--------------------------------------------------|-------------------|-----------------------------------|
|                                                 | <b>RR</b>                                                | <b>(95% C.I.)</b> | <b><i>p</i>-Value<sup>b</sup></b> | <b>RR</b>                                        | <b>(95% C.I.)</b> | <b><i>p</i>-Value<sup>b</sup></b> |
| <b>Eczema</b>                                   |                                                          |                   |                                   |                                                  |                   |                                   |
| Fruits and vegetables intake during pregnancy   |                                                          |                   |                                   |                                                  |                   |                                   |
| ≤ 517.26 gr/day                                 | 1.00                                                     | (0.87, 1.16)      | 0.981                             | 1.08                                             | (0.91, 1.28)      | 0.588                             |
| > 517.26 gr/day                                 | 1.02                                                     | (0.90, 1.16)      |                                   | 1.12                                             | (0.95, 1.32)      |                                   |
| Circulating vitamin D during pregnancy          |                                                          |                   |                                   |                                                  |                   |                                   |
| ≤ 20.89 ng/mL                                   | 0.97                                                     | (0.82, 1.16)      | 0.354                             | 1.06                                             | (0.88, 1.29)      | 0.876                             |
| 20.90 - 30.20 ng/mL                             | 0.98                                                     | (0.81, 1.17)      |                                   | 0.98                                             | (0.83, 1.16)      |                                   |
| > 30.20 ng/mL                                   | 0.98                                                     | (0.81, 1.19)      |                                   | 1.05                                             | (0.83, 1.34)      |                                   |
| Duration of breastfeeding                       |                                                          |                   |                                   |                                                  |                   |                                   |
| None                                            | 0.99                                                     | (0.71, 1.38)      | 0.077                             | 0.95                                             | (0.45, 2.04)      | 0.135                             |
| ≤ 6 months                                      | 1.25                                                     | (0.86, 1.81)      |                                   | 1.19                                             | (0.98, 1.46)      |                                   |
| > 6 months                                      | 0.97                                                     | (0.64, 1.48)      |                                   | 1.16                                             | (0.76, 1.78)      |                                   |
| <b>Ear infections</b>                           |                                                          |                   |                                   |                                                  |                   |                                   |
| Fruits and vegetables intake during pregnancy   |                                                          |                   |                                   |                                                  |                   |                                   |
| ≤ 517.26 gr/day                                 | 1.22                                                     | (1.00, 1.48)      | 0.655                             | 1.15                                             | (0.94, 1.39)      | 0.954                             |
| > 517.26 gr/day                                 | 1.13                                                     | (0.95, 1.34)      |                                   | 1.15                                             | (1.04, 1.28)      |                                   |
| Maternal circulating vitamin D during pregnancy |                                                          |                   |                                   |                                                  |                   |                                   |
| ≤ 20.89 ng/mL                                   | 1.12                                                     | (0.88, 1.42)      | 0.294                             | 1.11                                             | (0.95, 1.29)      | 0.534                             |
| 20.90 - 30.20 ng/mL                             | 1.29                                                     | (1.03, 1.60)      |                                   | 1.12                                             | (0.99, 1.26)      |                                   |
| > 30.20 ng/mL                                   | 1.13                                                     | (0.88, 1.46)      |                                   | 1.31                                             | (1.01, 1.70)      |                                   |
| Duration of breastfeeding                       |                                                          |                   |                                   |                                                  |                   |                                   |
| None                                            | 1.20                                                     | (0.98, 1.47)      | 0.906                             | 1.19                                             | (0.90, 1.59)      | 0.185                             |
| ≤ 6 months                                      | 1.21                                                     | (0.95, 1.53)      |                                   | 1.15                                             | (0.88, 1.51)      |                                   |
| > 6 months                                      | 1.30                                                     | (0.98, 1.72)      |                                   | 1.31                                             | (1.10, 1.56)      |                                   |

<sup>a</sup> Associations are adjusted for the covariates indicated in Table 3 of the main manuscript

<sup>b</sup> Combined  $p$ -value of the area-specific interaction term  $p$ -values
